# Supplementary material for: Assessing a Video-Based Intervention to Promote Parent Communication Strategies with a Deaf Infant: A Feasibility and Acceptability Study
Source: MDPI journal article supplement (doi:10.3390/jcm11185272), 2022-09-07
Supplement: s1 [file s1]

Participant number: \_\_\_\_\_

### Supplementary Materials S3: Intervention Diary

**Please record each time you try advice from the video**

Day 1 date: \_\_\_\_\_

[illegible]

Participant number: \_\_\_\_\_

**Please record each time you try the advice from the video**

Day 2 date: \_\_\_\_\_

[illegible]
