# Supplementary material for: Assessing a Video-Based Intervention to Promote Parent Communication Strategies with a Deaf Infant: A Feasibility and Acceptability Study
Source: MDPI journal article supplement (doi:10.3390/jcm11185272), 2022-09-07

# Supplementary Materials S4: Participant-level Raincloud Plots Showing Changes from Pre- to Post-intervention for Each Behavior

**Figure S1:** Participant-level raincloud plots showing changes from pre- to post-intervention for visual accessibility of language

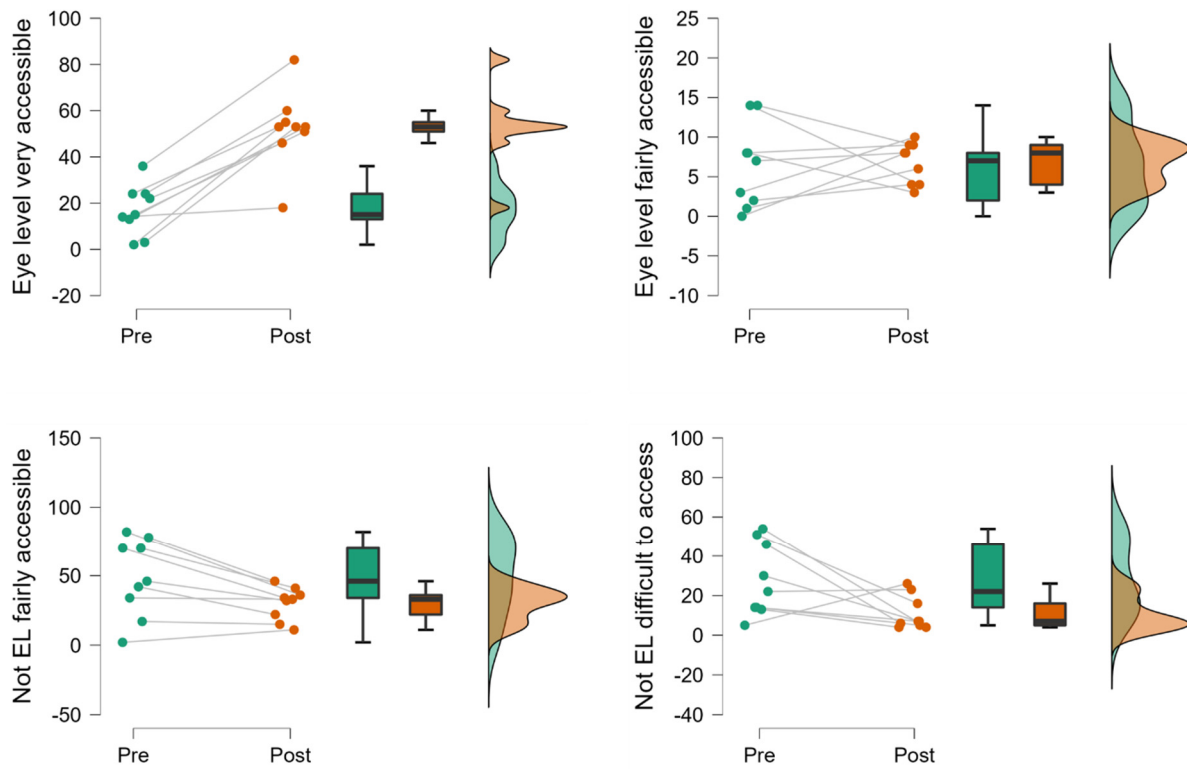

Note. EL = Eye level

**Figure S2:** Participant-level raincloud plots showing changes from pre- to post-intervention for auditory accessibility of language

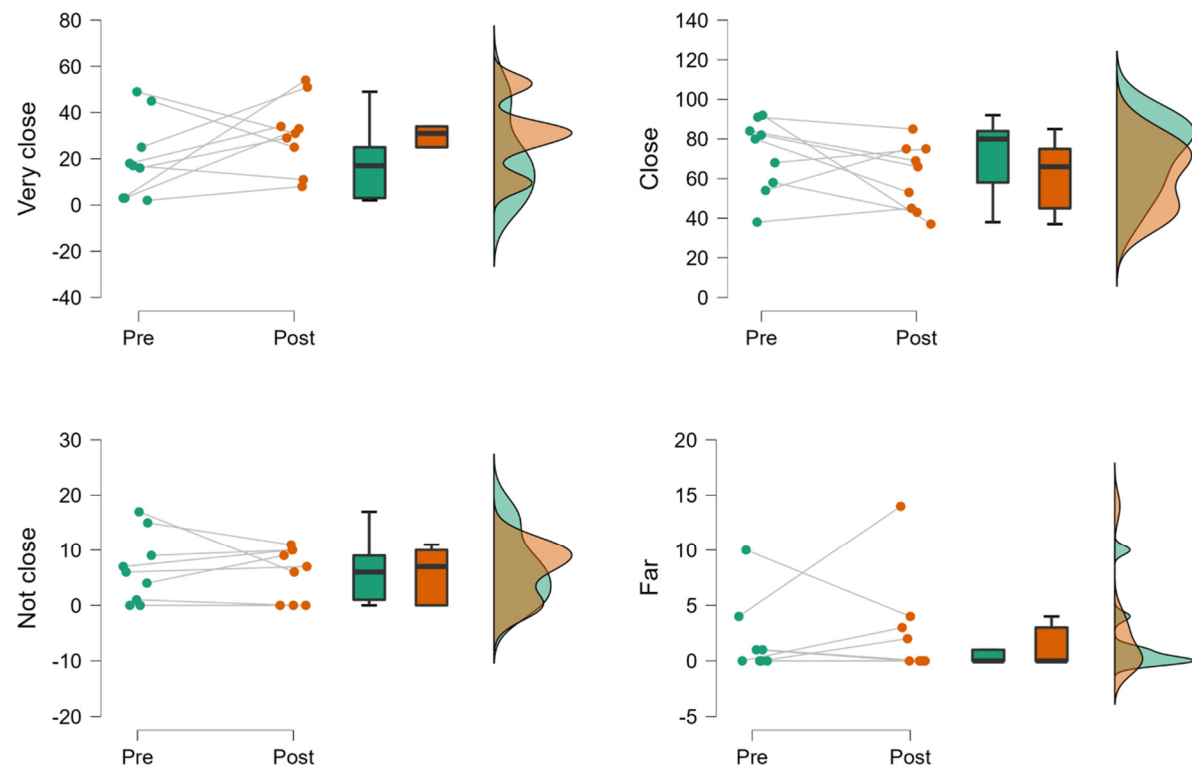

**Figure S3:** Participant-level raincloud plots showing changes from pre- to post-intervention for semantically contingent talk

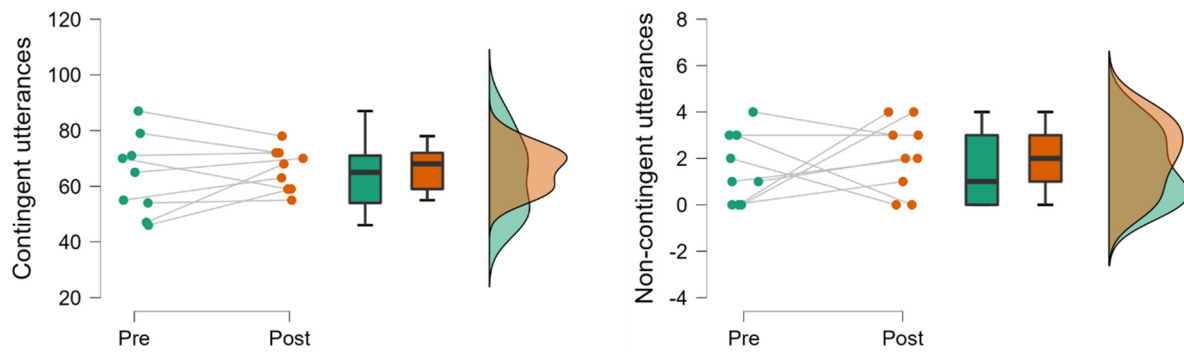

**Figure S4:** Participant-level raincloud plots showing changes from pre- to post-intervention for repetition in child directed speech

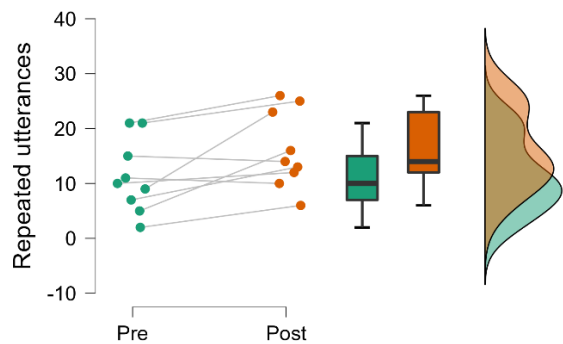

**Figure S5:** Participant-level raincloud plots showing changes from pre- to post-intervention for attention getting episodes and individual attention getting strategies

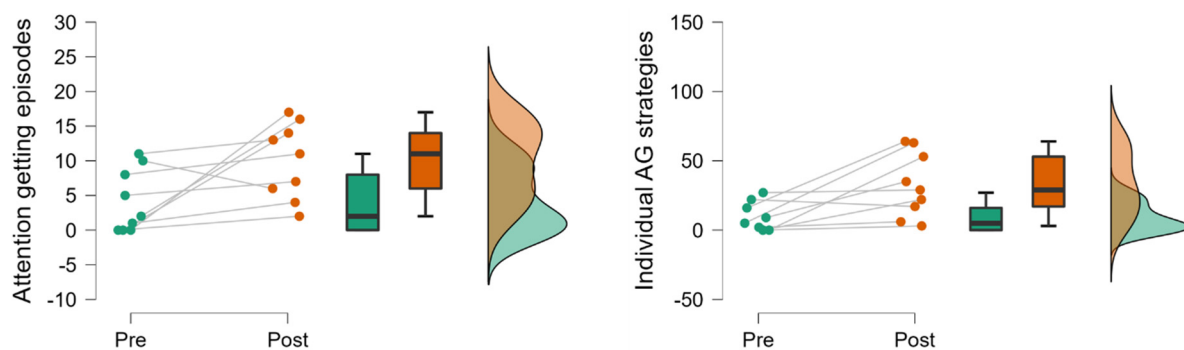

Note. AG = attention getting

**Figure S6:** Participant-level raincloud plots showing changes from pre- to post-intervention for function of attention getting episodes

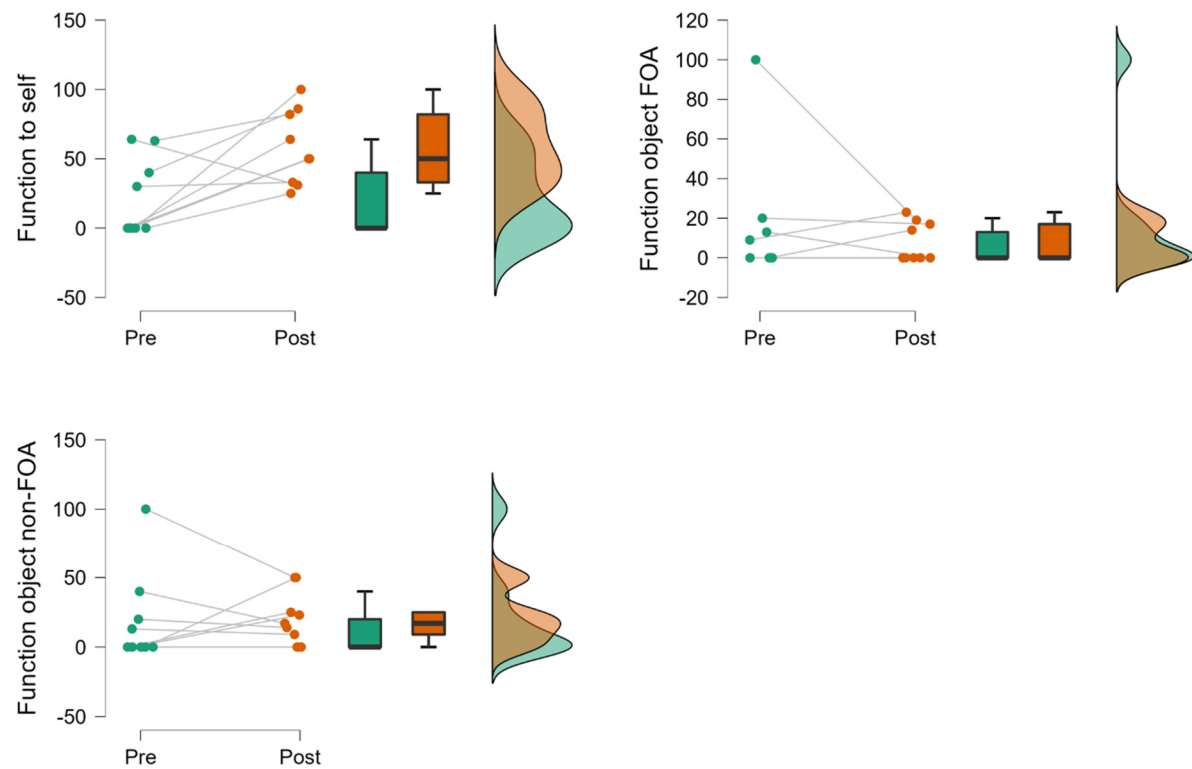

Note. FOA = focus of attention

**Figure S7:** Participant-level raincloud plots showing changes from pre- to post-intervention for outcome of attention getting episodes to elicit infant visual attention to self

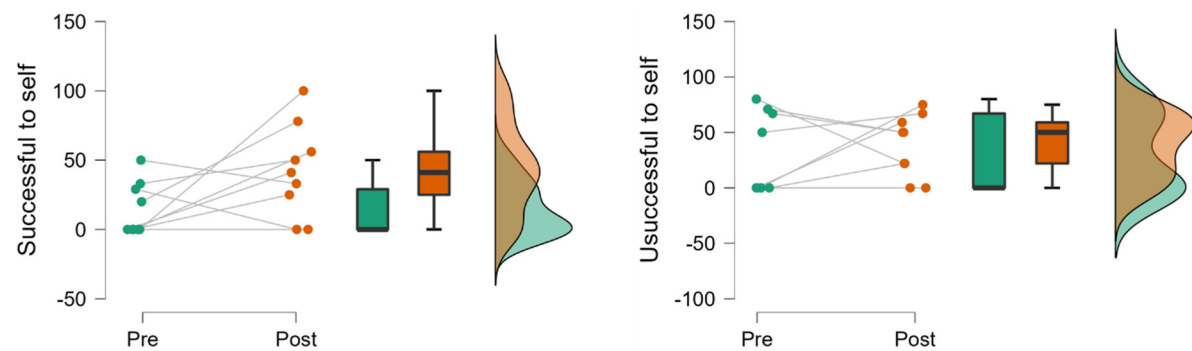

**Figure S8:** Participant-level raincloud plots showing changes from pre- to post-intervention for persistence

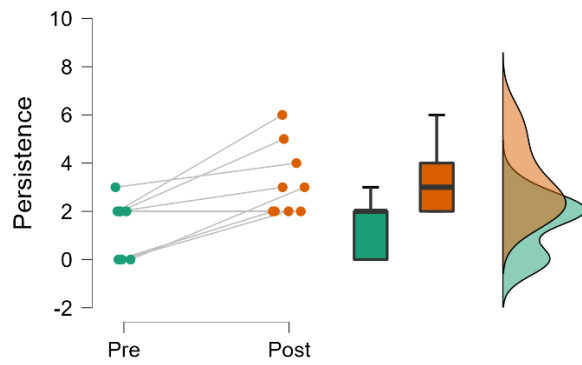

Supplement: s1 [file s1]
