# Supplementary material for: Assessing a Video-Based Intervention to Promote Parent Communication Strategies with a Deaf Infant: A Feasibility and Acceptability Study
Source: J Clin Med. 2022 Sep 7;11(18):5272. doi: 10.3390/jcm11185272 (PMC9505164; doi:10.3390/jcm11185272)
Supplement: Supplementary file 1 [file jcm-11-05272-s001.zip]

Archive with 5 entries (5 files):
- Supplementary Materials S1_Study1VideoScript.pdf
- Supplementary Materials S2_CodingManual.pdf
- Supplementary Materials S3_InterventionDiary.pdf
- Supplementary Materials S4_RainCloudPlots.pdf
- Supplementary Materials S5_Study2VideoScripts.pdf
